# Supplementary material
Source: Royal Society of Chemistry journal article supplement (doi:10.1039/d6sm00044d)

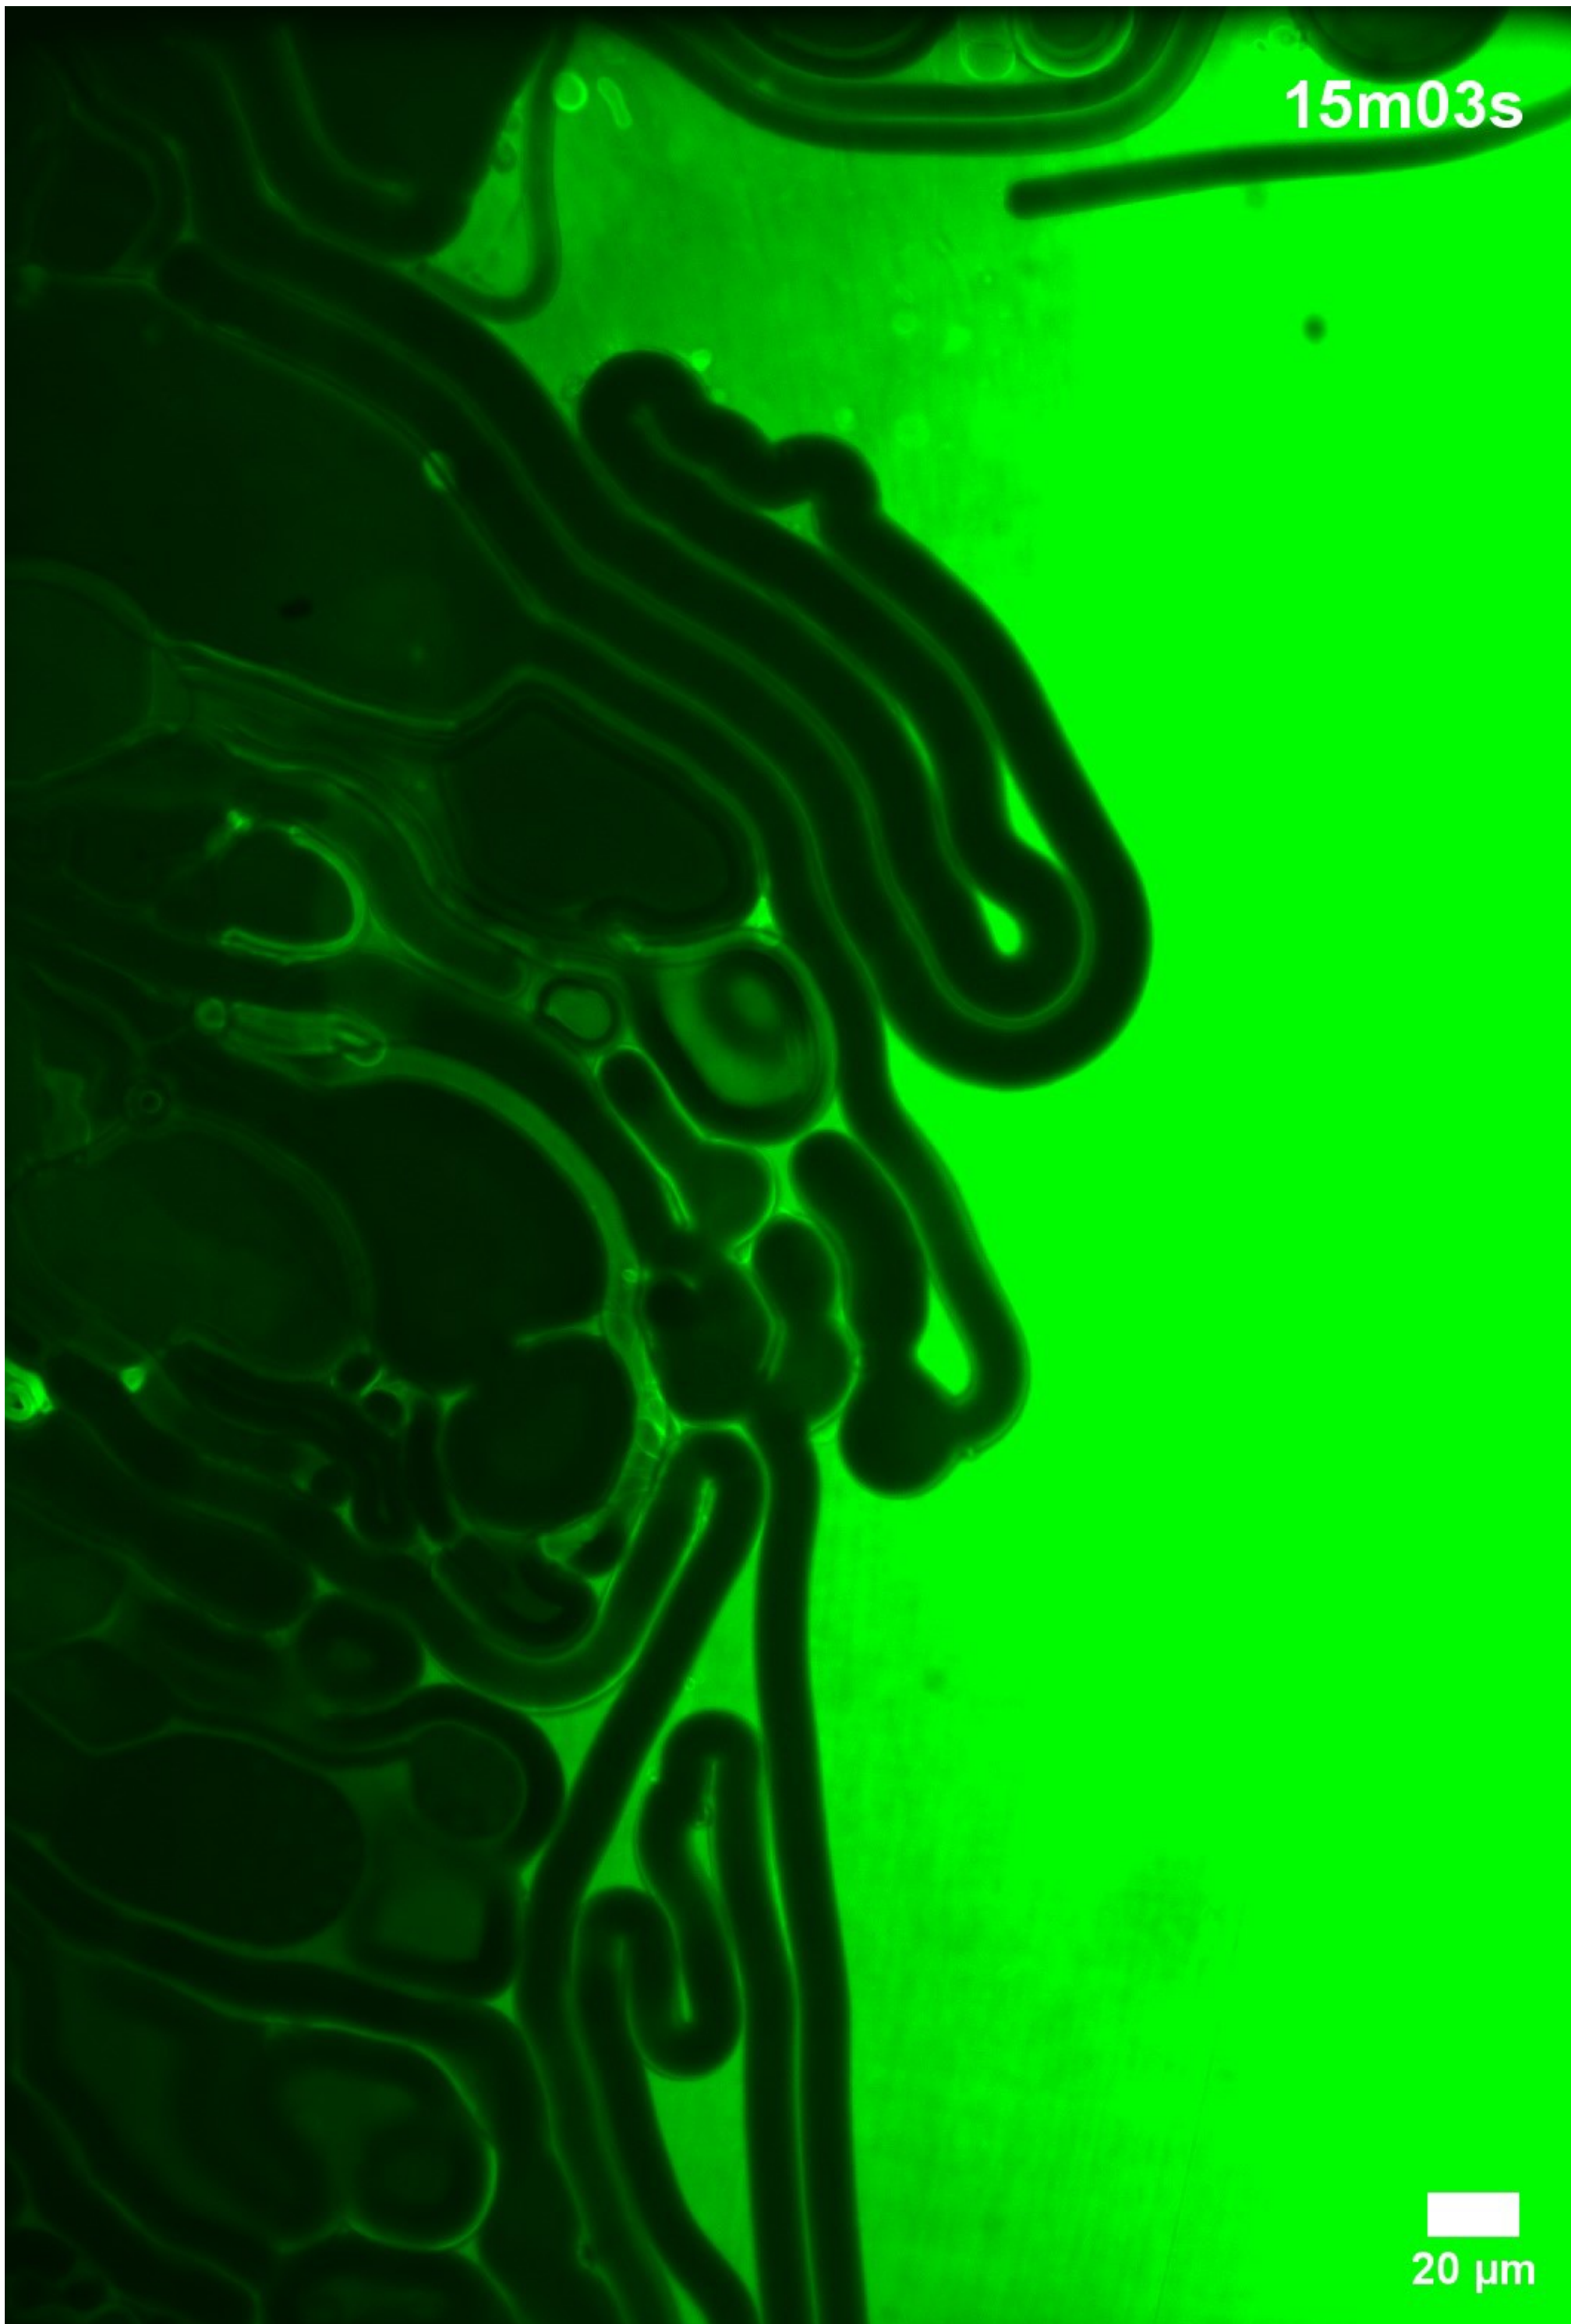

Supplement: d6sm00044d8.pdf [file d6sm00044d8.pdf]
